1 **How do King Cobras move across a major highway? Unintentional wildlife**  
2 **crossing structures may facilitate movement.**

3 Max Dolton Jones<sup>1\*</sup>, Benjamin Michael Marshall<sup>1</sup>, Samantha Nicole Smith<sup>1</sup>, Matt Crane<sup>3</sup>, Inês  
4 Silva<sup>3</sup>, Taksin Artchawakom<sup>2</sup>, Pongthep Suwanwaree<sup>1</sup>, Surachit Waengsothorn<sup>2</sup>, Wolfgang  
5 Wüster<sup>4</sup>, Matt Goode<sup>5</sup>, Colin Thomas Strine<sup>1\*\*</sup>

6

7 <sup>1</sup>School of Biology, Suranaree University of Technology, Nakhon Ratchasima, Thailand

8 <sup>2</sup>Thailand Institute of Science and Technological Research, Nakhon Ratchasima, Thailand

9 <sup>3</sup>School of Bioresources and Technology, King Mongkut's University of Technology  
10 Thonburi, Bangkok, Thailand

11 <sup>4</sup>Molecular Ecology and Fisheries Genetics Laboratory, School of Natural Sciences, Bangor  
12 University, Bangor, UK

13 <sup>5</sup>School of Natural Resources and Environment, University of Arizona, Tucson, Arizona, USA

14 **Corresponding author email:** \*maxdoltonjones@gmail.com, [\\*\\*colin\\_strine@sut.ac.th](mailto:**colin_strine@sut.ac.th)

15

16 **Abstract**

17 1. Global road networks continue to expand, and the wildlife responses to these landscape-  
18 level changes need to be understood to advise long-term management decisions. Roads  
19 have high mortality risk to snakes because snakes typically move slowly and can be  
20 intentionally targeted by drivers.

21 2. We investigated how radio-tracked King Cobras (*Ophiophagus hannah*) traverse a  
22 major highway in northeast Thailand, and if reproductive cycles were associated with  
23 road hazards.

- 24 3. We surveyed a 15.3km stretch of Highway 304 to determine if there were any locations  
25 where snakes, and other wildlife, could safely move across the road (e.g., culverts,  
26 bridges). We used recurse analysis to detect possible road-crossing events, and used  
27 subsets of King Cobra movement data to create dynamic Brownian Bridge Movement  
28 Models (dBBMM) in an attempt to show movement pathways association with possible  
29 unintentional crossing structures. We further used Integrated Step Selection Functions  
30 (ISSF) to assess seasonal differences in avoidance of major roads for adult King Cobras  
31 in relation to reproductive state.
- 32 4. We discovered 32 unintentional wildlife crossing locations capable of facilitating King  
33 Cobra movement across the highway. Our dBBMMs failed to show if underpasses were  
34 being used by telemetered individuals; however, the tracking locations pre- and post-  
35 crossing provided strong evidence of underpass use. Our ISSF suggested a lower  
36 avoidance of roads during the breeding season, though the results were inconclusive.  
37 With the high volume of traffic, large size of King Cobras and a 98.8% success rate of  
38 crossing the road in our study, we strongly suspect that individuals are using the  
39 unintentional crossing structures to safely traverse the road.
- 40 5. Further research is needed to determine the extent of wildlife underpass use at our study  
41 site and globally, alongside using previously proven fencing to facilitate their use. We  
42 propose that more consistent integration of drainage culverts and bridges could help  
43 mitigate the impacts of roads on some terrestrial wildlife, particularly in areas where  
44 roads fragment forests and wildlife corridors.

45

#### 46 **Key Words**

47 bridge, drainage culvert, mortality, *Ophiophagus hannah*, road crossing, space use

48

## 49 **Introduction**

50 Southeast Asia is one of the world's many biodiversity hotspots, combining a rich fauna and  
51 flora with a myriad of human-mediated threats are endangering the biodiversity (Myers et al.  
52 2000; Hughes 2017; Ng et al. 2020). The growing human population in Southeast Asia  
53 continues to increase urbanisation (Schneider et al. 2015), and road networks continue to  
54 expand to meet human demands, posing threats to wildlife (Ascensão et al. 2018; Hughes  
55 2018). Roads are either diffuse or hard barriers to wildlife movement (Shepard et al. 2008a;  
56 Brehme et al. 2013), dividing habitats and resources, and potentially undermining wildlife  
57 population integrity and reducing genetic diversity (Aresco 2005; Row et al. 2007; Balkenhol  
58 and Waits 2009; Clark et al. 2010; Jackson and Fahrig 2011; Herrmann et al. 2017). Alongside  
59 fragmenting habitats, roads can also constitute a direct source of mortality for wildlife via  
60 vehicular collisions (Bernardino and Dalrymple 1992; Rosen and Lowe 1994; Lodé 2000;  
61 Aresco 2005; Das et al. 2007; Row et al. 2007). Some drivers can intentionally target certain  
62 animals, such as snakes; therefore, potentially leading to targeted species disproportionately  
63 affected by roads (Langley et al. 1989; Ashley et al. 2007; Beckmann and Shine 2012; Assis et  
64 al. 2020; but not detected by Secco et al. 2014).

65

66 Wildlife managers can alleviate the risks from roads, mitigate road mortality and facilitate  
67 animal movement by implementing wildlife-crossing infrastructure (Lister et al. 2015). Once  
68 wildlife becomes acclimated to crossing structures, the structures help sustain animal mobility  
69 across fragmented landscapes, aiding wildlife access to resources and conspecifics for gene  
70 flow (Clevenger and Barrueto 2014). Wildlife-crossing locations can be underpasses, such as  
71 culverts or tunnels, or overpasses, which are generally large vegetated land bridges (Dodd Jr.  
72 et al. 2004; Clevenger and Huijser 2009; Glista et al. 2009). Wildlife crossings have been  
73 successful in facilitating animal movement in several cases (Forman 2003; Beckmann et al.

74 2010), such as for mule deer in western North America (Simpson et al. 2016), a diversity of  
75 wild mammals in Poland (Myslajek et al. 2016, Ważna et al. 2020) and turtle species in Canada  
76 (Markle et al. 2017).

77

78 Snakes are common victims of roads, likely due to low movement speeds, unique body shape  
79 and mode of locomotion (Andrews and Gibbons 2005). Additionally, snakes are  
80 disproportionately targeted by road users (Ashley et al. 2007; Beckmann and Shine 2012), and  
81 thus an important group to protect from the risks presented by roads. However, studies so far  
82 reveal an infrequent, and unpredictable, use of ecopassages by snakes (Baxter-Gilbert et al.  
83 2015).

84

85 The King Cobra (*Ophiophagus hannah* [CANTOR, 1836]), is a large, venomous snake widely  
86 distributed throughout Southeast Asia and ranging from India to China and the Philippines.  
87 The IUCN classifies King Cobras as Vulnerable (Stuart et al. 2012) with decreasing  
88 populations and urges investigations into King Cobra's threats. Andrews and Gibbons (2005)  
89 showed that stout-bodied species (in the South eastern USA) had slower crossing speeds than  
90 longer, slender-bodied sympatric species. This suggests that King Cobras could also exhibit  
91 relatively fast movement speeds across roads; however, these crossing speeds would likely be  
92 undermined by the large length and mass of this active forager. Actively foraging species, with  
93 high mobility, demonstrate plasticity in their use of microhabitats, often increasing their risk  
94 from roads (Forman et al. 2003; Hartmann et al. 2011). King Cobras are susceptible to road  
95 mortality in areas where major roads divide habitats, such as in the Sakaerat Biosphere Reserve  
96 (SBR) in northeast Thailand (Marshall et al. 2018; 2020). Despite small sample sizes of  
97 mortalities in Marshall et al. (2018), four vehicle collisions were recorded among a total of 14

98 mortality events, prompting further investigation into the potential impacts roads have on King  
99 Cobras.

100

101 During routine road construction, plans typically integrate drainage culverts sporadically to  
102 divert water from road surfaces. However, such structures may also act as unintended wildlife-  
103 crossing locations for small taxa (Clevenger and Waltho 2000; Ng et al. 2004; Aresco 2005;  
104 Ascensão and Mira 2007; Grilo et al. 2008; Sparks and Gates 2017; Brunen et al. 2020). In  
105 central Ontario, Canada Baxter-Gilbert et al (2015), found that three reptile species used  
106 culverts as eco-passages during monitoring: Painted Turtles (*Chrysemys picta*), Snapping  
107 Turtles (*Chelydra serpentina*) and Northern Watersnakes (*Nerodia sipedon*). In addition,  
108 Aresco (2005) demonstrated the importance of an under-highway culvert for reducing turtle  
109 mortality, when augmented with drift fences.

110

111 Based on the evidence presented above, it is reasonable to suggest that King Cobras are likely  
112 using some unintended wildlife crossing structures to safely traverse the roads. The abundance  
113 and importance of roads in and around the BR make this an ideal site to explore the role of  
114 these structures in assisting movement across roads by King Cobras. In this paper, we therefore  
115 aim to identify potential areas that could facilitate movement of these large snakes across a  
116 busy major road within the SBR. Using a long-term dataset on the movement ecology of King  
117 Cobras in northeast Thailand, we explore the following: 1) are there any structures present  
118 along the highway which could facilitate King Cobra movement? 2) are King Cobra  
119 reproductive cycles associated with road hazards (e.g., seasonal avoidance of roads or increased  
120 rates of vehicle collision)?

121

122

123 **Methods**

124 *Study site*

125 We conducted field work from 22 March 2014 to 28 August 2020, at the Sakaerat Biosphere  
126 Reserve (SBR), Nakhon Ratchasima Province, Thailand (14.44-14.55° N, 101.88-101.95° E;  
127 Figure 1). The SBR consists of three areas of differing levels of protection: a core protected  
128 forested area covering 80 km<sup>2</sup> consisting of mainly dry dipterocarp forest and dry evergreen  
129 forest; a buffer zone consisting of areas of reforestation and plantations, and lastly a transitional  
130 area dominated by agriculture (rice, casava, corn, and sugar). The transitional area contains  
131 159 settlements with 72,000 inhabitants (Thailand Institute of Scientific and Technological  
132 Research, 2018), and a network of both paved and dirt roads. The forested areas of the core  
133 area and transitional zone are bisected by the National Highway 304 (with dense, expansive  
134 forest on either side of the highway), built initially in 1956, with further road improvement in  
135 1966 and subsequent expansion from two to four lanes in 2005 (Laurence 2014; Vaeokhaw et  
136 al. 2020). Highway 304 transects several protected forests, including the largest fragment of  
137 surviving forest in Central Thailand that hosts high biodiversity of threatened or endangered  
138 herpetofauna (Silva et al. 2020).

139

140 A second major road perpendicular to the Highway 304, Nong Weng – Ta Ling Chan (304NW-  
141 TLC), passes through a populated area in the transitional zone, East of the Highway 304 (Figure  
142 1). We studied this road because it is the first major road (with tarmac and multiple lanes)  
143 separating the agricultural area from the un-protected forest fragment to the south; therefore,  
144 the road has substantial conservation implications, especially for female King Cobras that are  
145 forced to circumvent the road to reach forested areas, where oviposition typically occurs.

146

147

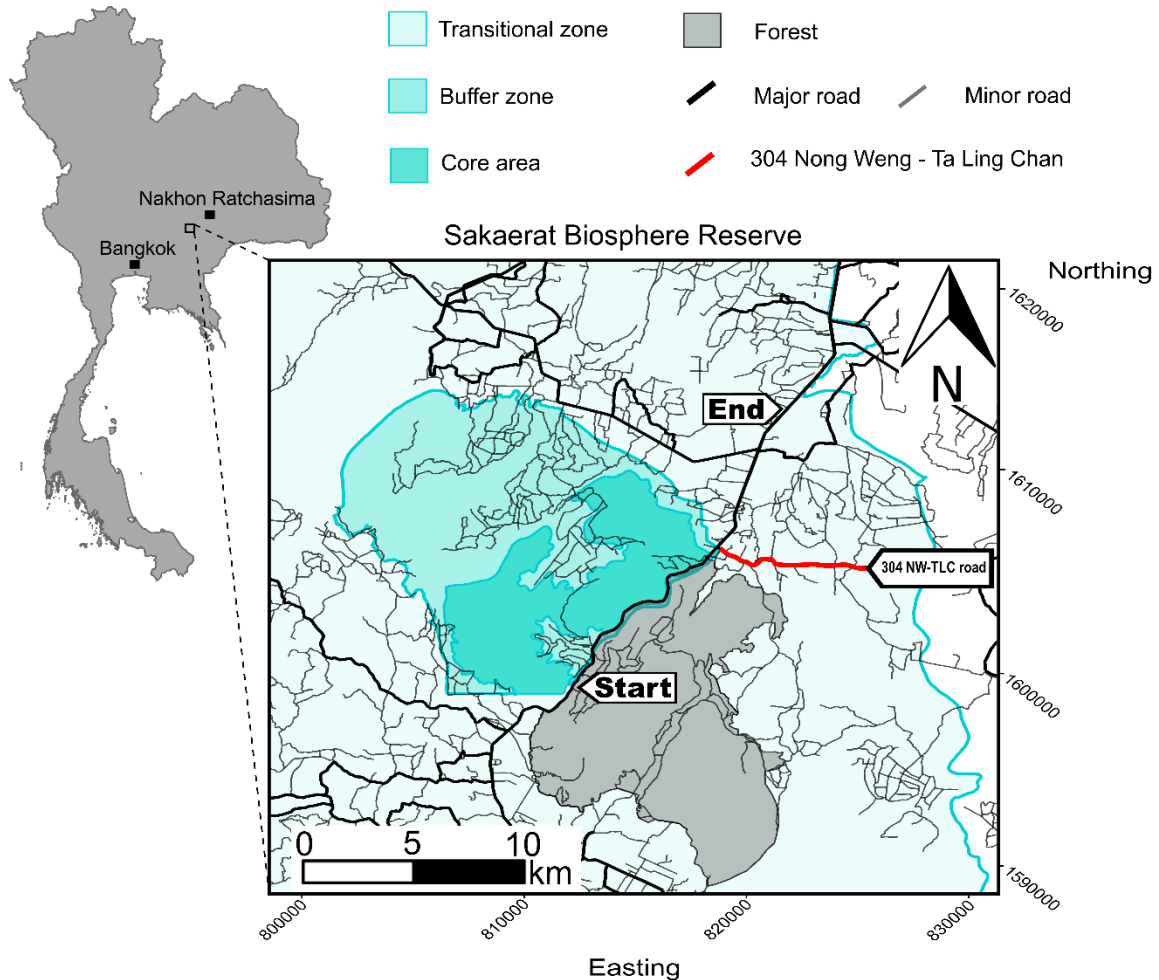

148

149 Figure 1. Study site map in relation to Bangkok and Nakhon Ratchasima cities. The three  
150 Sakaerat Biosphere Reserve zones are delineated by their level of protection via increased  
151 opacity (increasing opacity represents increased protection). The bold red line shows the 304  
152 Nong Weng – Ta Ling Chan Road. The *Start* and *End* mark the section of Highway 304  
153 included in our study.

154

### 155 *Capture*

156 We performed unstandardized visual encounter surveys, on foot and via road-cruising surveys  
157 using motorcycles, throughout accessible locations in the SBR (Marshall et al. 2018, 2019,  
158 2020). We also relied on notifications from local residents and rescue teams to locate and  
159 capture individuals. We captured King Cobras between 19 March 2014-18 March 2020, using

160 a combination of opportunistic captures, villager notations and active visual surveys. We gave  
161 each snake a unique ID based on age-class, sex and capture number (e.g., AM018 refers to an  
162 adult male that was the 18<sup>th</sup> King Cobra captured, JF055 refers to a juvenile female that was  
163 the 55<sup>th</sup> King Cobra captured).

164

165 We anaesthetised King Cobras using isofluorane to obtain accurate morphological  
166 measurements and perform radio transmitter implant surgeries, following procedures outlined  
167 in Reinert and Cundall (1982). We implanted Holohil AI-2T or SI-2T transmitters into the  
168 coelomic cavity. We initially marked individuals with a unique brand on the ventral/dorsal  
169 scales using a disposable medical cautery device (Winne et al. 2006). We switched to passive  
170 integrated transponders (PIT-tags) beginning with AM054.

171

172 We released snakes within 24 hours post-surgery, at an average distance of 191 m (range = 0  
173 – 1263 m, Supplementary Table 1) from their capture site. We aimed to release snakes as close  
174 to their reported capture site as possible; however, distances had to be increased when snakes  
175 were captured within, or near homes. Our largest recorded distance released from capture  
176 location was the result of needing to remove the snake from a large human settlement area, as  
177 requested by residents. All release locations were subsequently shown to be within the  
178 estimated occurrence distributions of our telemetered individuals. Because we recaptured  
179 AM006, AM007 and AF010 after transmitters from their first implant failed, we used capture  
180 and release information from this subsequent recapture, because the original data were  
181 inaccurate (Supplementary Table 1).

182

183

184



185 *Radio telemetry*

186 Radio tracking protocol changed throughout the study, due to staff availability and changes in  
187 investigation targets (initially we only aimed to assess home range sizes and habitat use, while  
188 in later years we added movement patterns and site fidelity to the program). We tracked snakes  
189 nearly continuously, until AM006. We maintained signal contact with the snakes every 15  
190 minutes, and determined the snake's location every hour between 06:00-22:00. From 09 March  
191 2014-28 July 2018, we radio tracked individuals 006-026 four times per day (i.e., 06:30, 11:00,  
192 16:00, 20:00), with a mean of  $8.5 \pm 0.1$  hours between fixes. We radio tracked individuals 027-  
193 099, from 28 July 2018-01 August 2020 three times per day aiming for 5 h intervals between  
194 successful pinpoints (Supplementary Figure 1 displays overall study time lag distribution for  
195 each individual). We usually radio tracked King Cobras in daylight; however, we occasionally  
196 radio tracked snakes at night, depending on individual movements and landscape type. We  
197 triangulated snake locations, attempting to maintain a minimum distance of 10 m from the  
198 snake (occasionally compromised by sub 10m GPS accuracy or difficult terrain), which  
199 enabled us to be reasonably confident that the snake was within a 5 m<sup>2</sup> area. We recorded the  
200 triangulated location (Universal Transverse Mercator 47 N WGS 84 datum) using handheld  
201 GPS units, recording date, time and GPS accuracy.

202

203 *Quantifying crossing structure characteristics*

204 We identified drainage culvert locations along Highway 304 using roadside markers,  
205 presumably set by construction workers. No over-the-road structures exist at our study area,  
206 and therefore all crossing structures mentioned herein refer to corridors which allow animals  
207 to move directly underneath the road. We recorded locations of both entrances for all drainage  
208 culverts and bridges (viaducts) encountered, along with vertical diameter of entrance (mm),  
209 horizontal diameter of entrance (mm), length of structure (m), vegetation cover at entrance

210 (yes/no), dominant substrate within the structure and connectivity to landscape feature (i.e.,  
211 none, stream or irrigation canal) for each crossing. We calculated distances (m) between  
212 adjacent potential crossing structures with the measuring tool in QGIS (v. 3.14.15 'pi').

213

#### 214 *Identifying road crossing events*

215 We manually created spatial polygons using QGIS v.3.14.15 'pi', for the entire study area  
216 encompassing the side of Highway 304 that contained the core protected area, herein referred  
217 to as *North Side* (Supplementary Figure 2). We used the *recurse* package v.1.1.0 in R (Bracis  
218 et al. 2018) to calculate the number of times each telemetered snake entered, or exited, the  
219 North Side spatial polygon, which corresponded to a road-crossing event across Highway 304  
220 (Supplementary Figure 2). We also created a spatial polygon encompassing the area South of  
221 the 304NW-TLC road; herein referred to as *South Side* (Supplementary Figure 3). Using the  
222 *recurse* package, we recorded each time a nesting female King Cobra entered, or exited, the  
223 South Side spatial polygon, corresponding to an event during which the snake traversed the  
224 road (Supplementary Figure 3). Due to only having one adult male which interacted with the  
225 304NW-TLC road and poor temporal resolution for this individual, we chose to only sample  
226 adult female King Cobras for the *South Side* spatial polygon. This allowed us to investigate if  
227 there were any temporal patterns for reproductive females to interact with the 304NW-TLC  
228 road during nesting movements.

229

230 The *recurse* analysis provided the approximate time that a highway crossing event occurred for  
231 each snake (although the time provided is restricted to the nearest datapoint collected). We then  
232 took subsets of the radio tracking data, that consisted of fixes taken two weeks prior to, and  
233 two weeks after, each crossing event. We ran dynamic Brownian Bridge Movement Models  
234 (dBBMMs) on these subsets to estimate an occurrence distribution describing the possible

235 movement pathways taken during a crossing event, using the *move* package v.3.1.0 in R  
236 (Kranstauber et al. 2016). Because the subsets were shorter time periods than our overall  
237 tracking periods, we used a window size of 15 and margin size of 3 to detect temporally fine-  
238 scale changes in movement states (specifically, shifts between resting/sheltering and  
239 movement) when using underpasses. Following the methods outlined in Marshall et al. (2020),  
240 we extracted 90%, 95% and 99% contours (confidence areas), using R packages *adehabitatHR*  
241 v.0.4.16 (Calenge 2006), and *rgeos* v.0.4.2 (Bivand and Rundel 2020), to visualise the  
242 movement pathways when crossing Highway 304. Examples of our dBBMM subsets can be  
243 seen in Supplementary Figure 4-9. In addition to our dBBMM subsets, we also visualised the  
244 points directly before and after a crossing event, to investigate if single, direct movements  
245 could also serve as a proxy to determine underpass use by adult King Cobras.

246

#### 247 *Integrated step-selection function*

248 We used Integrated Step-Selection functions (ISSF) from the *amt* package v.0.0.6 in R (Signer  
249 et al. 2019) to assess the influence of major roads on adult King Cobra movement (i.e.,  
250 avoidance or attraction). Integrated Step-Selection functions use observed locations (steps) of  
251 telemetered animals to generate random steps using observed step characteristics (step length,  
252 turning angle). In ISSFs, predictor covariates (i.e., Euclidean distance to major roads) are used  
253 to discern which covariates influence animal movement.

254

255 We separated tracking periods in to two seasons, incorporating breeding and nesting in one  
256 season and the remainder of an individual's tracking duration during the non-breeding season.  
257 The earliest date we observed breeding (over multiple years) was 10 March, and the latest date  
258 that a female left her nest was 05 July, which we used to define the extent of breeding season.  
259 We added 10-day buffers to start and end dates to account for natural variation that we may

260 have missed in the population, ultimately resulting in an annual breeding season from 01 March  
261 to 15 July. We used an inverted raster layer which described varying distances from major  
262 roads within the SBR; we inverted the raster to aid interpreting model outputs (Marshall et al.  
263 2020). Following methodology by Fortin et al. (2005), Marshall et al. (2020) and Smith et al.  
264 (2021), we simulated 200 random points for each step, allowing for broad sampling of the  
265 surrounding landscape. We opted to use a large number of random points due to the coarseness  
266 of VHF radiotelemetry compared to GPS telemetry data, the latter usually only affording a  
267 single, or very few, random steps per used step due to the high temporal resolution of data and  
268 computational cost (Northrup et al. 2013; Thurfjell et al. 2014). Two-hundred random points  
269 also facilitates coverage of rare features or smaller changes within a landscape.

270

271 We evaluated avoidance of, and attraction to, roads by telemetered adult King Cobras at both  
272 the individual and population levels. Each model included step length, turning angle and  
273 (inverted) distance from major roads as predictors. We investigated population-level effects  
274 following R script by Muff et al. (2020), which involved using a Poisson regression model with  
275 stratum-specific effects, and accounting for the data's structure (both individual ID and  
276 step/strata) using Gaussian processes. Following Muff et al., (2020) we used fixed prior  
277 precision of 0.0001 for strata-specific effects and fitted the model using the *INLA* v.20.03.17  
278 package (Rue et al. 2020). We radio tracked AF010, AF096 and AF099 only during the  
279 breeding season, so these snakes were only included in the breeding models. In contrast, we  
280 radio tracked AF056 only during the non-breeding season and therefore was only used in non-  
281 breeding season models. We included AF017, AF058 and AF086 in both non-breeding and  
282 breeding models. In summary, we included four adult females in population-level non-breeding  
283 models and six adult females in population-level breeding models. All adult males had  
284 sufficient data to be included in all ISSF models.

285 *Software*

286 Information about the software and R packages used can be found in the supplementary  
287 document. We opted to follow best practises in data sharing to enhance utility of our study and  
288 optimise for meta-analysis inclusion (Tedersoo et al. 2021).

289

290 **Results**

291 *Radiotelemetry*

292 From 22 March 2014-28 July 2020, we radio tracked 21 King Cobras: eight adult males, seven  
293 adult females, four juvenile males, and two juvenile females (Supplementary Table 2). We  
294 recaptured, and subsequently radio tracked, three snakes (i.e., AM006, AM007 and AM010),  
295 after 842, 1405, and 280 days missing from the study respectively. We radio tracked snakes for  
296 an average of  $344.53 \pm 55.65$  days (range = 134 – 3122 days). We obtained an average of  $920$   
297  $\pm 157$  fixes (range = 66 – 1176 fixes) on telemetered King Cobras, with an average of  $9 \pm 0.06$   
298 hours (range = 0.05 – 793.85 hours; Supplementary Figure 1) between fixes. Snakes relocated  
299 on average  $263 \pm 48$  times during telemetry (range = 31 – 985 relocations).

300

301 *Road-crossing location and characteristics*

302 We recorded 32 potential road-crossing locations (underpasses) along the 15.3 km section of  
303 highway (Euclidean distance from the first and last crossing point; Figure 2). Of the 32 road-  
304 crossing locations, 21 were single drainage culverts, seven were double drainage culverts (two  
305 culverts side by side) and four were bridges (Figure 2). Twenty-six of these crossing points (24  
306 drainage culverts and two bridges) were within an 8 km section of the highway adjacent to the  
307 forest comprising the protected area of the SBR (Figure 2). Road-crossing structures were  
308 spaced out along the highway at a mean distance of  $536.3 \pm 88.4$  m (range = 191 – 2620 m).

309

310 Crossing structures had a mean length of  $40.94 \pm 1.75$  m (range = 26 – 82 m), a mean entrance  
311 height of  $1138.16 \pm 127.13$  mm (range = 194 – 3000 mm), and a mean entrance width of  
312  $3792.22 \pm 1418.51$  mm (range = 543 – 30000 mm; Supplementary Table 2). All crossing points  
313 were concrete constructions, except for one metal drainage culvert (C24). There was usually  
314 no substrate within structures (n = 17), although those with substrate consisted of gravel (n =  
315 5), rocks (n = 4), water (n = 3), soil (n = 2) and in one instance tar-like substance. Most crossing  
316 structures were not connected to any further water flow systems (n = 20); nine were adjacent  
317 to stream beds and three had connecting irrigation canals (three out of the four bridges were  
318 connected to irrigation canals). All crossing structures contained some anthropogenic waste  
319 either at the entrance, or within the structure. The entrances of only four culverts were devoid  
320 of any vegetation cover (C4, C6, C14 and C28).

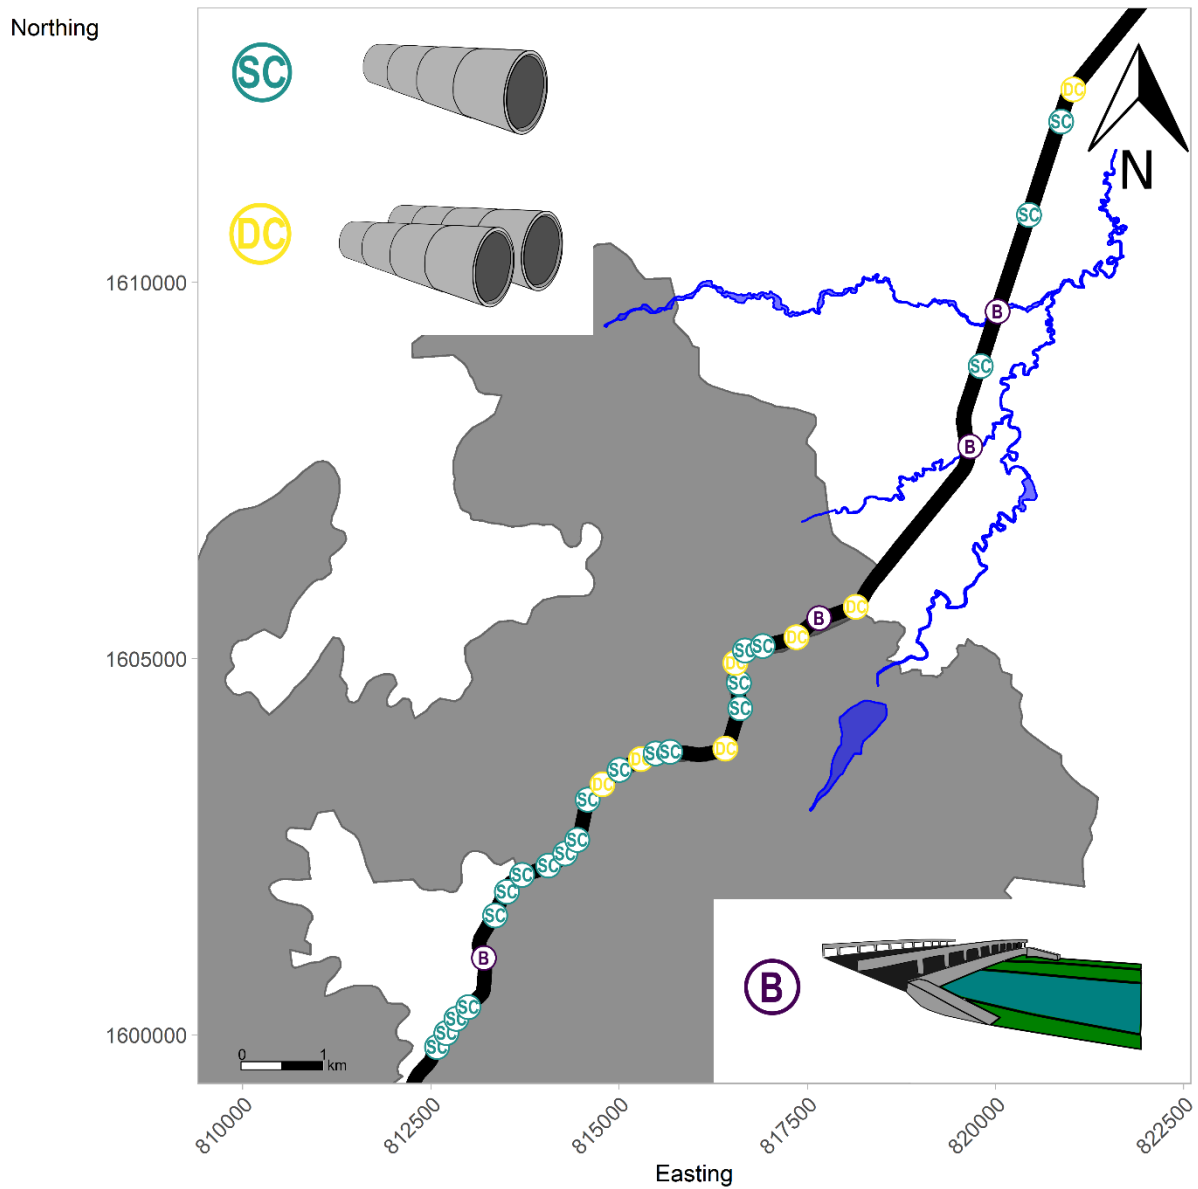

321

322 *Figure 2.* Location and structure type of all crossing structures throughout the survey area. *SC*

323 = single culvert, *DC* = double culvert, *B* = bridge. Grey depicts forested areas and blue indicates

324 irrigation canals and water features throughout the site. Culverts are named in chronological

325 order (C1-C32) from southwest to northeast (Supplementary Table 2).

326

327

328

329 *Road Crossing and motion variance*

330 We confirmed nine of 21 telemetered King Cobras had crossed Highway 304: five adult males  
331 (AM006, AM007, AM015, AM018, AM054), three adult females (AF010, AF017, AF058)  
332 and one juvenile female (JF055; Figure 3). Adult males crossed the highway 14 times (range =  
333 1 – 37 times per individual) on average, adult females crossed an average of twice (range = 2  
334 – 3 times per individual) and the single juvenile female crossed four times. We ultimately  
335 recorded 84 crossing attempts of Highway 304, with one King Cobra fatality; thus, resulting in  
336 a 98.8% success rate when attempting to traverse the road (Figure 4).

337

338

339



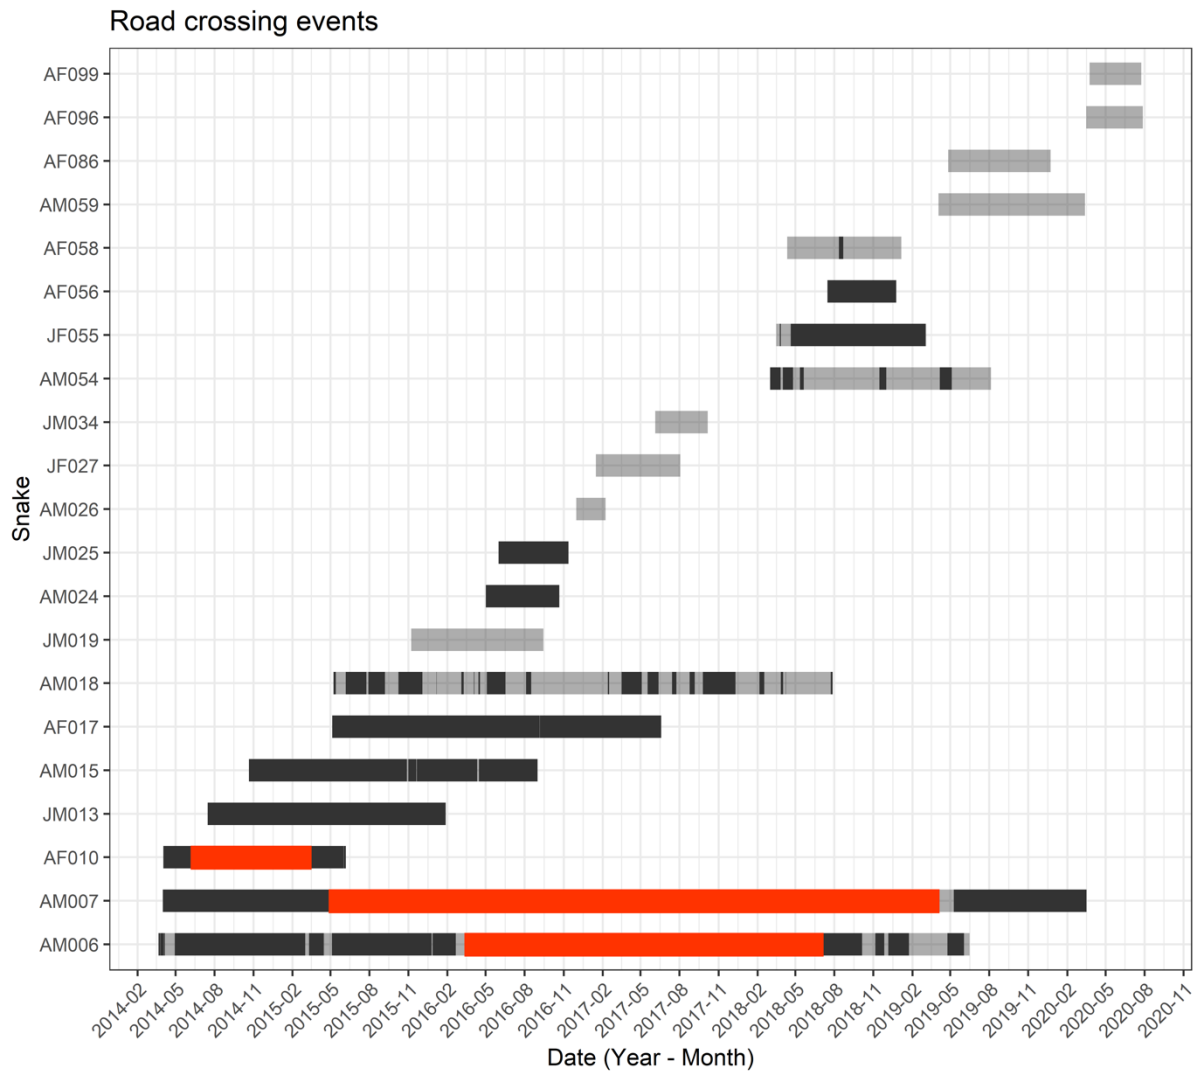

340

341 *Figure 3.* Road-crossing events from all 21 telemetered King Cobra. Each grey bar corresponds

342 to an individual, and opaque bars show when individuals were within the North Side spatial

343 polygon. Transitions from grey to black correspond to a snake crossing over Highway 304.

344 Red bars indicate periods of time when individuals were not radio tracked.

345

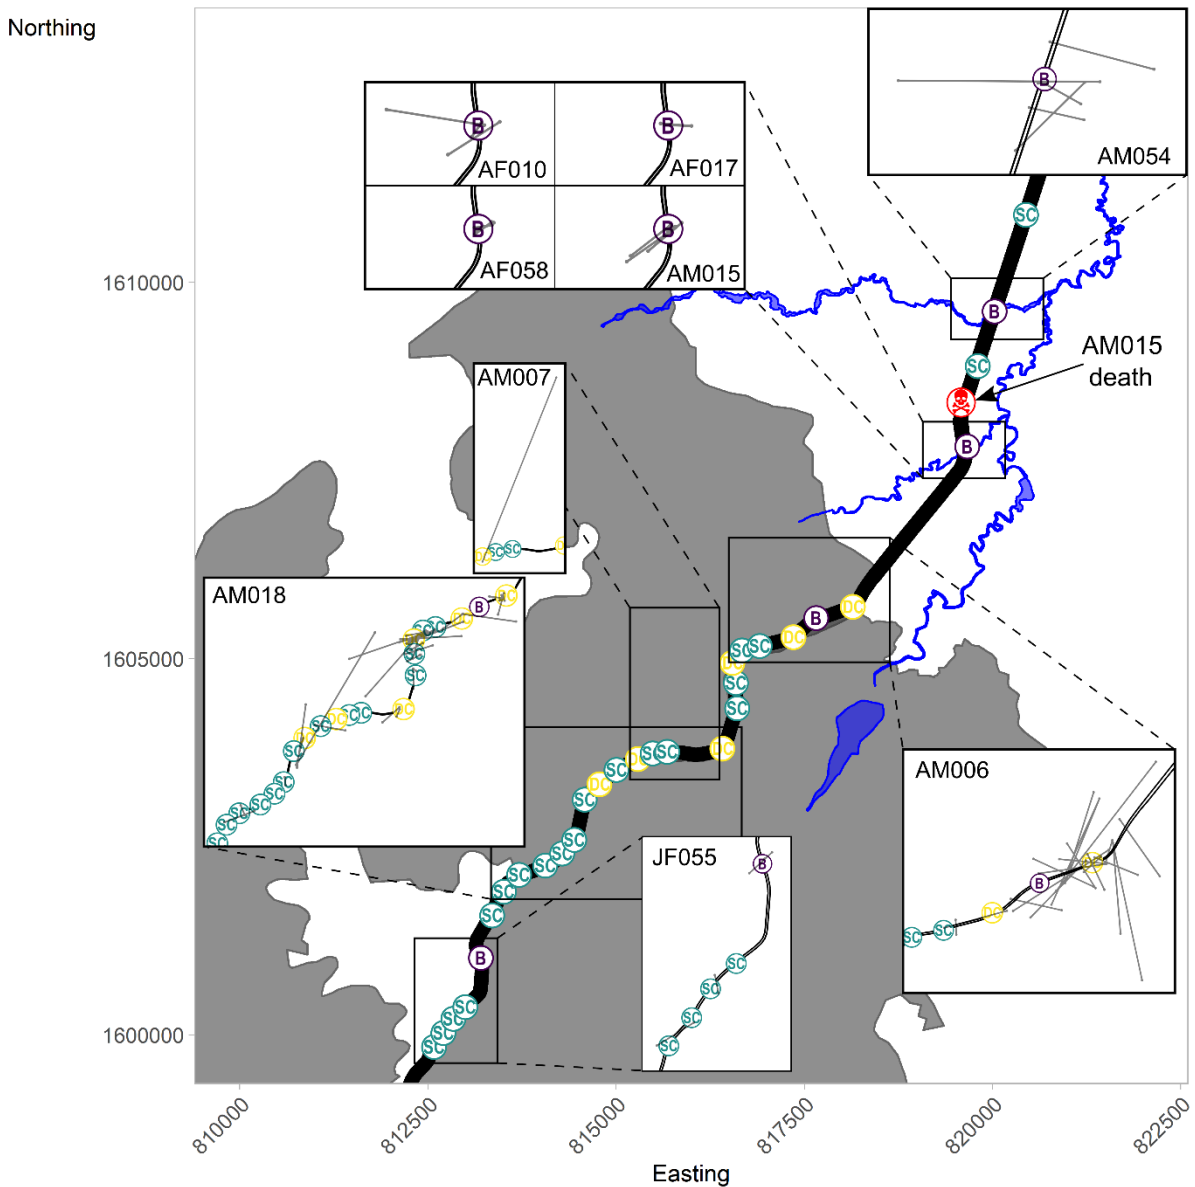

346

347 *Figure 4.* All recorded King Cobra road-crossings along Highway 304, overlapped with  
348 crossing structure locations and structure type. *SC* = single culvert, *DC* = double culvert, *B* =  
349 bridge. The map also depicts the location of AM015's death (road-kill).

350

351 Each telemetered female that nested on the South side of the highway, crossed over 304NW-  
352 TLC at least once during the study. All nesting females South of the road entered the South  
353 Side spatial polygon, and associated forested/forest-adjacent area, between 11 April-5 May.

354 Three of four telemetered females subsequently left the South Side spatial polygon, which  
355 corresponds to moving away from forested area and into the agricultural matrix, from 18 June-  
356 2 July. One female, AF099, moved North following successful nesting, making continuous  
357 movements towards 304NW-TLC road; however, her transmitter failed on 24 July 2020 before  
358 we could observe her crossing the road and leaving the forest. We radio tracked three females,  
359 AF058, AF086 and AF096, for 182, 188 and 40 days respectively after they crossed back to  
360 the North side of 304NW-TLC road. During this subsequent radio tracking, females used the  
361 agricultural landscape and we recorded no further crossing events (Figure 5).  
362

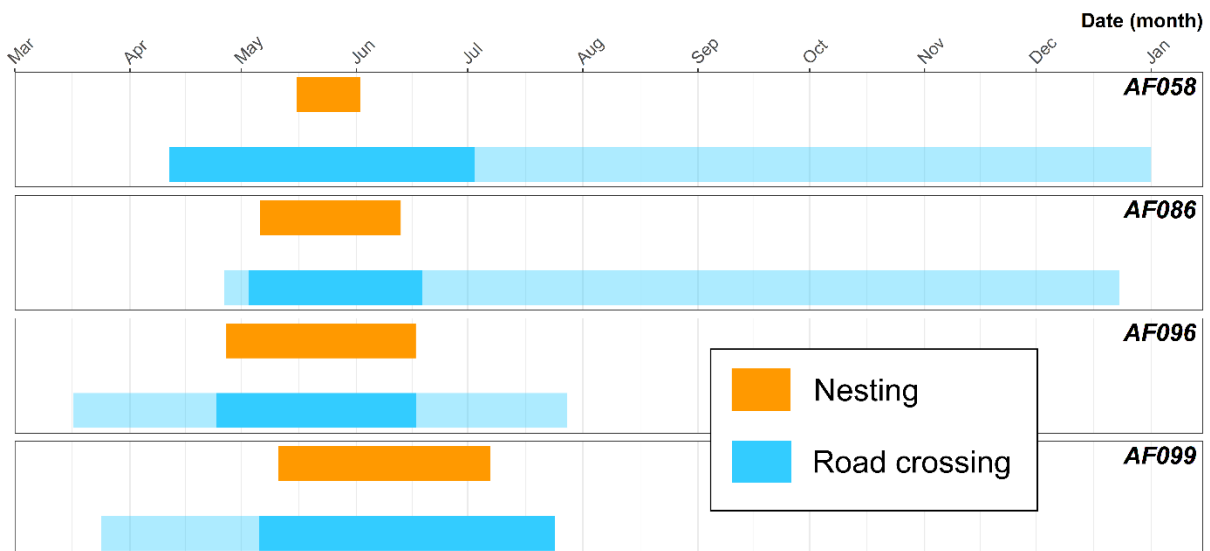

363  
364 *Figure 5.* Adult female King Cobra nesting and road crossing. Orange bars highlight the nesting  
365 duration. Opaque blue bars represent when an individual was within the South Side spatial  
366 polygon (South of 304NW-TLC road within forested areas for nesting). Transitions from  
367 translucent to opaque blue bars show road crossing events.

368  
369  
370  
371

372 *Integrated step-selection functions*

373 Because we inverted our raster layers (Euclidean distances to major roads), positive  
374 coefficients expressed positive association with roads (i.e., attraction). Locations of nine adult  
375 King Cobras were positively associated with major roads during the breeding season (AF010,  
376 AF017, AF058, AF096, AM006, AM007, AM018, AM024 and AM059; Figure 6); whereas,  
377 locations of four individuals indicated avoidance of roads during the breeding season (AF086,  
378 AF099, AM015 and AM054; Figure 6). Four adult males showed a positive association with  
379 roads during the non-breeding season (AM007, AM015, AM018 and AM024; Figure 6). Three  
380 adult males and all four females included in the non-breeding season model exhibited an  
381 avoidance of major roads (AF017, AF056, AF058, AF086, AM006, AM054 and AM059;  
382 Figure 6). However, all confidence intervals for adult females overlapped zero, and many of  
383 our results for the adult males, likely due to our coarse radiotelemetry fixes which limited our  
384 inferences.

385

386

387

388

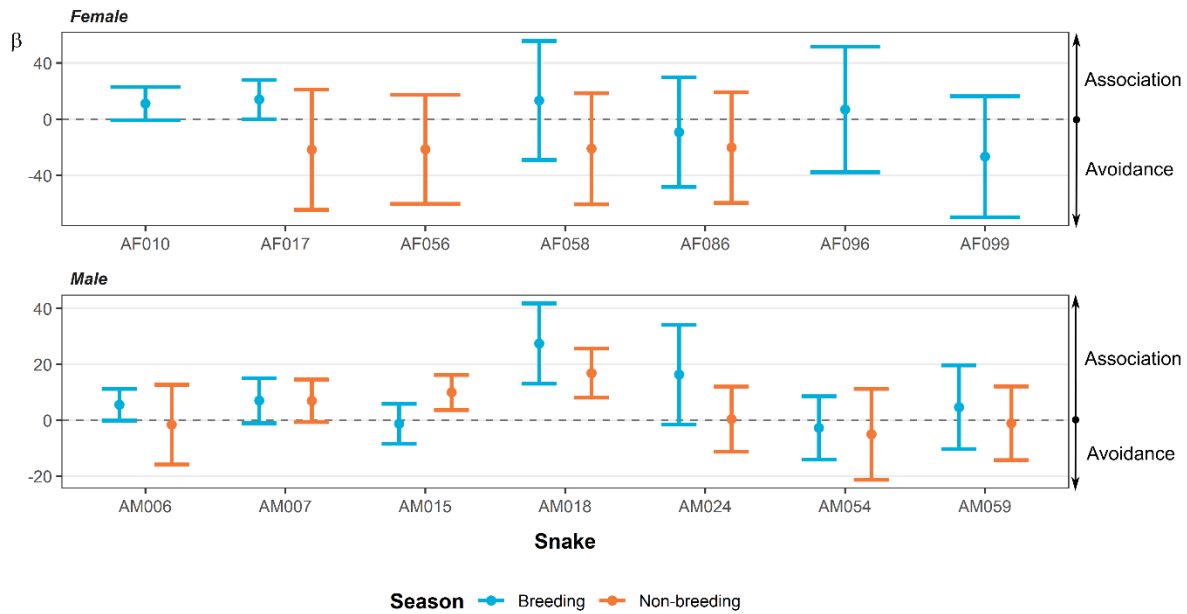

389

390 *Figure 6.* The coefficients relating to major roads from the integrated step-selection function  
391 analyses. Breeding and non-breeding season are depicted by blue and orange respectively.  
392 Circles show the  $\beta$  estimate from the model and error bars show the associated 95% confidence  
393 intervals for each estimate.

394

395 Population-level ISSF models indicated low association with major roads during the breeding  
396 season in adult males ( $\beta = 4.76^{-04}$ , 95% CI  $-5.42^{-04} - 0.0014$ ; Figure 7) and adult females ( $\beta =$   
397  $5.02^{-04}$ , 95% CI  $-1.52^{-04} - 0.0012$ ; Figure 6). The population-level ISSF for adult males in the  
398 non-breeding season showed a similar result to the breeding season ( $\beta = 4.83^{-04}$ , 95% CI  $-1.05^{-04}$   
399  $- 0.001$ ; Figure 7); however, the adult females exhibited a lower association during the non-  
400 breeding season ( $\beta = 1.9^{-04}$ , 95% CI  $-9.61^{-04} - 0.0013$ ; Figure 7). In all population-level ISSF  
401 models, confidence intervals overlapped zero which limits inferences.

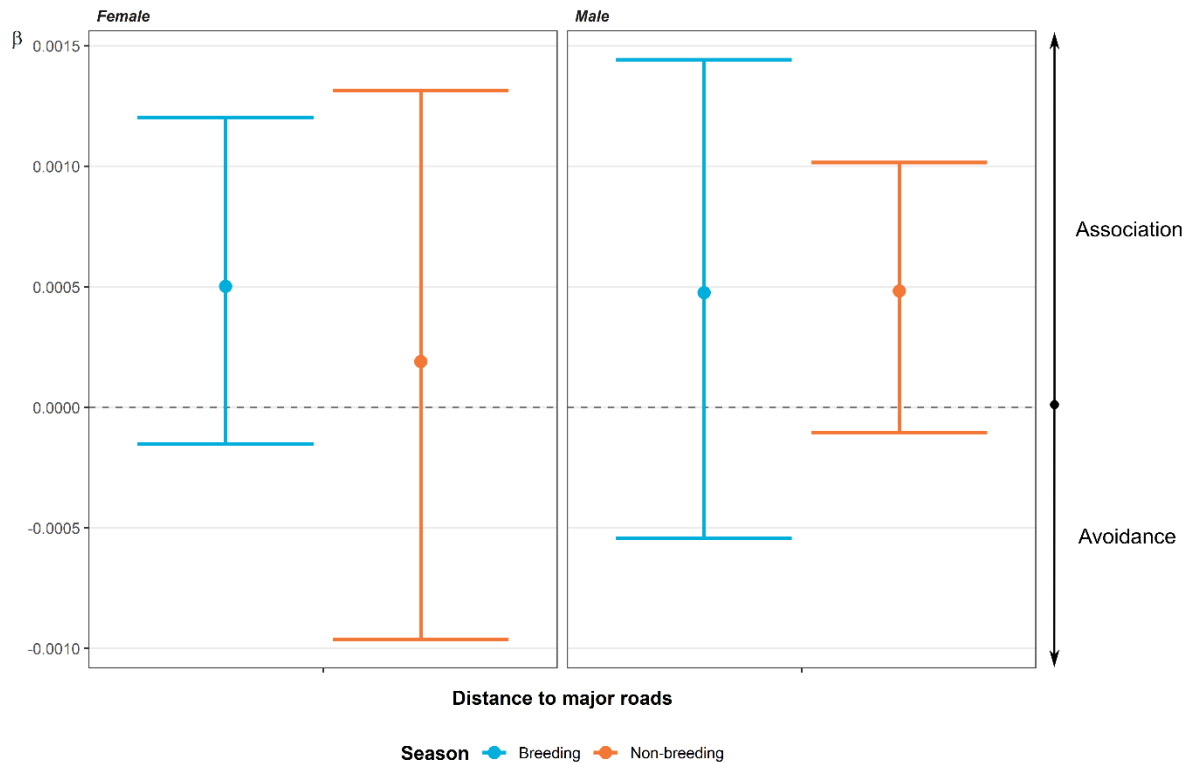

402

403 *Figure 7.* The coefficients relating to major roads from the population-level integrated step-  
404 selection function analyses. Breeding and non-breeding season are depicted by blue and orange  
405 respectively. Circles show the  $\beta$  estimate from the model and error bars show the associated  
406 95% confidence intervals for each estimate.

407

## 408 Discussion

409 We investigated the interactions of King Cobras with roads at the edge of a protected area  
410 within the Sakaerat Biosphere Reserve (SBR), Thailand. King Cobras repeatedly traversed a  
411 major four-lane highway, with individual snakes crossing up to 37 times during the study. We  
412 documented 32 potential crossing locations within a 15.3 km stretch of highway that  
413 telemetered King Cobras could potentially use to traverse the road. We observed three  
414 telemetered King Cobras using different types of underpasses, including one drainage culvert  
415 and two bridges (evidence of two; Figure 8). All individual-level ISSF results showed an equal  
416 or greater attraction to roads during the breeding season, except one individual, AM015, who

417 we repeatedly observed moving in to the forest to breed and thus further away from road  
418 structures. Our population-level ISSF showed negligible changes in movement in relation to  
419 major roads for adult King Cobras within and outside the breeding season. However, our results  
420 suggest that adult female King Cobras exhibit a greater avoidance of roads during the non-  
421 breeding season, which we attribute to female King Cobras needing to cross a busy major road  
422 to access nesting sites during breeding season. Although all population-level ISSF confidence  
423 intervals overlapped zero, suggesting caution in interpreting our data, the evidence provided  
424 suggests that major roads bisecting typical female King Cobra occurrence distributions (within  
425 the agricultural landscape) and oviposition sites (forested areas) may present a particular  
426 mortality risk during what is already a hazardous time.

427

428

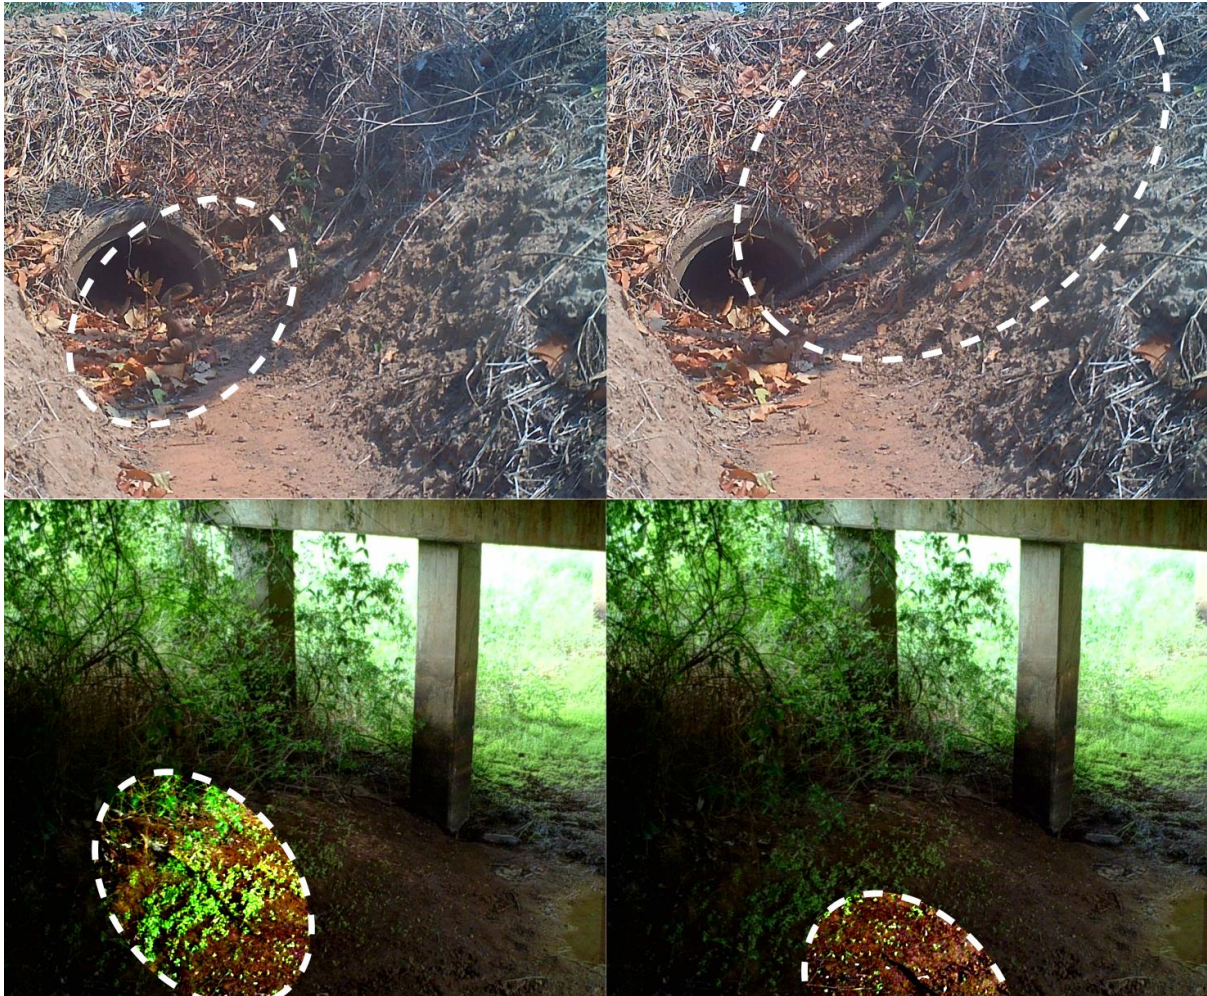

429

430 *Figure 8. Use of road-crossing structures by telemetered King Cobra. Top Use of a drainage*  
431 *culvert by AM015. Bottom Movement underneath a bridge by AM054. King Cobras in frame*  
432 *are highlighted with dashed-white circles.*

433

434 Intentional crossings structures for wildlife are absent from the SBR. We observed King Cobras  
435 in the SBR using a combination of drainage culverts and bridges to traverse the highway  
436 (Figure 4), but also attempting to cross the highway surface resulting in mortalities (Marshall  
437 et al., 2018). Because many of the telemetered King Cobras were tracked on one side of the  
438 road, and subsequently on the other side, we cannot directly confirm that individuals are  
439 routinely using underpasses as opposed to moving over the road. However, we have observed  
440 individuals moving underneath bridges (Figure 8), and we have obtained radio-telemetry fixes



441 directly underneath Highway 304. Highway 304 is one of the busiest roads in Thailand; in  
442 2006, 7,488 vehicles/day were recorded (Srikrajang 2006), which means one vehicle every  
443 11.5 seconds on average. Moreover, with a consistent expansion of road infrastructure and  
444 users (Ng et al. 2020), we suspect traffic volumes to have been much higher during our study  
445 period than those observed in 2006. With all of our adult King Cobras having a total length  
446 between two and four metres, it is unlikely that an individual would be able to avoid a vehicle  
447 collision during a crossing event on the road surface. Given the contrast between these risks  
448 and the relatively high rate of successful crossings, we suspect that most King Cobras actively  
449 moving over the road are at high risk of vehicle collision, and are likely to be using under-the-  
450 road structures as presented in this study.

451

452 Adult males appeared to traverse the highway more frequently earlier in the year (February-  
453 May), which may be a result of mate searching behaviour during the breeding season (Marshall  
454 et al. 2019; Figure 3). Other snake species have shown a propensity to cross roads more  
455 frequently during breeding periods, due to increased mate searching activity (Bonnet et al.  
456 1999; Lutterschmidt et al. 2005; Shepard et al. 2008b; Sosa and Schalk 2016). In our site,  
457 average crossing for adult males was much greater than for adult females, further supporting  
458 the mate searching role in road crossing frequency. However, this may reflect on the greater  
459 movement distance, frequency and overall greater occurrence distributions of adult males at  
460 our study site (Marshall et al. 2019).

461

462 Although we are confident that our unintentional crossing structures are being used by King  
463 Cobras to facilitate movement across the road, our low sampling frequency (~1 pinpoint every  
464 4-6 hours during the day) prevented us from routinely and confidently determining the  
465 structures used for every crossing (e.g., when multiple structures are available within close

466 proximity of each other); we only have observations of King Cobras using three of our recorded  
467 structures. By inspecting our dBBMM subsets of crossing events, it is difficult to ascertain  
468 underpass use depending on individual, location and time of year. Supplementary Figure 4-7,  
469 for example, provide strong evidence of specific underpass use; however, Supplementary  
470 Figure 8-9, present ambiguous results due to individuals moving along the edge of the road  
471 prior to crossing. Additionally, we performed a single evaluation of each structure (haphazard  
472 temporal sampling) that did not allow us to detect seasonal changes in characteristics; for  
473 example, habitat connectivity and vegetation cover.

474

475 Our recursive analysis presented us with approximate dates and times that each road-crossing  
476 event occurred, and we subsequently investigated the points directly before and after a crossing  
477 in an attempt to discover if unintentional crossing structures were being used, and if so, which  
478 ones (Figure 4). Within the agricultural landscape of our study site, our results suggest that  
479 King Cobras used two bridges most frequently to cross the road (only one direct observation  
480 was made; Figure 8). The bridges are constructed over irrigation canals; the canals present an  
481 important landscape feature that appears to facilitate King Cobra movement throughout the  
482 agricultural landscape (Marshall et al. 2020). Research on other taxa suggests that the  
483 surrounding landscape provides the best predictor for which crossing structures are used over  
484 structural design and dimensions of culverts (Yanes et al. 1995; Rodríguez et al. 1996;  
485 Clevenger et al. 2002); however, we were unable to perform such analysis here due to the  
486 uncertainty surrounding if structures are actually being used. Therefore, it is difficult to  
487 determine whether King Cobras are selecting road crossing locations based on crossing  
488 structures presence (and the characteristics of the crossing structures), or if the landscape  
489 structure is funnelling individuals to these areas (i.e., connected to established movement  
490 corridors such as irrigation canals).

491

492 While encouraging, potential King Cobra use of road-crossing structures do not mitigate all  
493 Highway 304 potential impacts (Cunnington et al. 2014; Rytwinski et al. 2016). Throughout  
494 our study, we have encountered seven incidents of King Cobra road-mortality, five of which  
495 occurred on Highway 304. Out of these five highway-mortalities two were juvenile males, two  
496 were young of the year and one was a telemetered adult male. The newly hatched and juvenile  
497 snakes may be less acclimated to the presence of the crossing structures and distances between  
498 underpasses would be relatively greater and more challenging for smaller snakes to access;  
499 therefore, potentially increasing juvenile snakes' vulnerability to road mortality. Several  
500 studies have reported increased road mortalities during juvenile emergence and dispersal  
501 (Erritzoe et al. 2003; Grilo et al. 2009; Kowalczyk et al. 2009). The discovery of our  
502 telemetered adult male, AM015, was worrying, particularly as our recursive analysis suggested  
503 that AM015 crossed underneath the same bridge on seven different occasions, showing a  
504 capacity to safely traverse the road, yet he crossed over the highway at least once and it led to  
505 the loss of the individual (Figure 4).

506 Reliance on underpasses may be insufficient to reduce road mortality, for small secretive taxa  
507 (such as amphibians) fencing and directive infrastructure are required to bolster underpasses'  
508 effectiveness (Rytwinski et al., 2016). Rytwinski et al (2016) observations suggest that a  
509 combined approach of directive structures (e.g., fencing) and wildlife road crossings would  
510 better facilitate road crossing events for species that are at an increased risk of road mortality.  
511 However, King Cobras would require considerably more robust fencing than amphibians.

512

513 Female individuals of threatened taxa often require unique resources for reproduction (Brown  
514 and Weatherhead 1997; Roth and Greene 2006). Female King Cobras invest heavily in

515 maternal care of eggs during oviposition and incubation (Whitaker et al. 2013; Hrima et al.  
516 2014; Dolia 2018), and our long-term observations of King Cobra movement suggests that  
517 females shift their space-use during the nesting season to find suitable locations for oviposition  
518 (Marshall et al. 2019, 2020). In India, female King Cobras have been observed to remain with  
519 the nest post-laying (Whitaker et al. 2013; Hrima et al. 2014; Dolia 2018). Individual activity  
520 spikes (quantified by motion variance values from dynamic Brownian Bridge Movement  
521 Model output) were associated with King Cobra reproductive behaviours (i.e., oviposition site  
522 selection, nest guarding) at our site (Marshall et al. 2019). Female King Cobras in Thailand  
523 may travel into forested areas for nesting resources (e.g., substrate for nest building, vegetative  
524 cover and protection) unavailable in the agricultural matrix. Our results suggest that there are  
525 greater road mortality risks to reproductive female King Cobras during the pre- and post-  
526 nesting period (Marshall et al., 2020), when individual females ordinarily using agricultural  
527 areas make large, direct moves to forested areas in order to locate oviposition sites; typically  
528 putting these individuals at greater risk of encountering major roads.

529

530 Unintentional crossing structures (bridges and drainage culverts) appear to facilitate King  
531 Cobra movements across a fragmented landscape, providing some promise for the survival of  
532 the population in the presence of sizable human-made barriers like major roads. We have  
533 observed adult females moving beneath a bridge, allowing for safe passage across the 304NW-  
534 TLC road, but we have also observed females moving over the road surface, narrowly escaping  
535 oncoming vehicles. Allocation of designed wildlife crossing structures along both of our  
536 sampled roads, using guidance from our movement data and previously outlined mortality  
537 hotspots in Silva et al. (2020), could provide a foundation for plans to reduce mortality caused  
538 by these roads for a diversity of taxa within the Sakaerat Biosphere Reserve.

539

540 *Conclusion*

541 Our findings add to a growing collection of road ecology literature attempting to decipher how  
542 animals interact with anthropogenic obstacles. Unintentional ecological underpasses are likely  
543 providing some level of permeability and prevent complete habitat fragmentation, which is  
544 particularly important for snakes given their reluctance to cross roads and their vulnerability  
545 when doing so (Shine et al. 2004; Andrews and Gibbons, 2005). King Cobras being larger and  
546 ranging further than most other reptiles makes them additionally vulnerable to habitat  
547 fragmentation and the dangers of roads (Bonnet et al. 1999; Rytwinski and Fahrig 2012). The  
548 presence of crossing structures (drainage culverts and bridges) along a major four-lane highway  
549 appears to enable King Cobras to traverse the road, providing a level of permeability. Despite  
550 this, we continue to discover individuals that have died due to vehicle collision on Highway  
551 304. We suggest two main future study avenues to be explored at the Sakaerat Biosphere  
552 Reserve. First, a monitoring study should be designed to evaluate the true use of unintentional  
553 wildlife crossing structures, as presented in this study, either via strategic and coordinated  
554 camera traps, or via more advanced systems, such as PIT-tag readers (Bateman et al. 2017).  
555 Second, research is needed to evaluate whether guidance fencing combined with a Before After  
556 Control Impact (BACI) along the Highway 304 structures could aid in limiting road mortalities  
557 for both King Cobras and other terrestrial species.

558

559 **Acknowledgements**

560 We thank the National Park, Wildlife and Plant Conservation Department, Thailand for  
561 giving us permission to study a nationally protected species, and the National Research  
562 Council of Thailand for providing permits to undertake this research. With these permissions,

563 we are grateful for surgical expertise provided by Nakhon Ratchasima Zoo, Dusit Zoo, and  
564 Zoological Park Organization under the Royal Patronage of His Majesty the King, Thailand.  
565 We thank the Institute of Animal Scientific Purpose Development for providing C.T.S. and  
566 P.S. with animal use licenses. We thank the Suranaree University of Technology and the  
567 School of Biology for ethically approving the study and further providing logistical,  
568 supervisory and financial aid. We thank Pluemjit Boonpueng for assisting with paper work  
569 and logistics. We thank Wildlife Reserves Singapore Conservation Fund, National Scientific  
570 and Technological Development Agency and Thailand Institute of Scientific and  
571 Technological Research, and the National Research Council of Thailand for funding the  
572 research at different stages. We also thank the Herpetofauna Foundation and St Stephen's  
573 International School, Bangkok, for donating essential equipment. We thank the staff and  
574 management at Sakaerat Environmental Research Station for their long-term logistic support  
575 throughout the project. We thank the residents of Udom Sab for allowing research to be  
576 undertaken across their land. We thank the Hook 31 Rescue teams for their tireless work  
577 mitigating human-snake conflict and providing us with a number of King Cobras. We give  
578 special thanks to the many Sakaerat Conservation and Snake Education Team members for  
579 dedicating countless hours tracking King Cobras throughout the landscape.

580

## 581 **Funding**

582 We received funding and/or equipment from the National Science and Technological  
583 Development Agency, Thailand; Wildlife Reserves Singapore; The Herpetofauna Foundation,  
584 Netherlands; St Stephen's International School, Bangkok; Thailand Institute of Scientific and  
585 Technological Research; Suranaree University of Technology.

586

587

## 588 **Availability of data and materials**

589 Data used in this study is available on Zenodo (DOI: 10.5281/zenodo.5148436) and Movebank  
590 (Movebank ID: 1649411628). The Zenodo repository also includes all R scripts used to run  
591 analysis.

592

## 593 **Author Contributions**

594 *Conceptualization*, M.D.J., B.M.M., S.N.S. and C.T.S.; *Methodology*, M.D.J., B.M.M, S.N.S.  
595 and C.T.S; *Formal Analysis*, M.D.J., B.M.M and S.N.S.; *Investigation*, M.D.J., B.M.M.,  
596 S.N.S., M.C., I.S. and C.T.S., *Writing – Original Draft*, M.D.J.; *Writing – Review & Editing*,  
597 M.D.J., S.N.S., C.T.S., B.M.M., M.C., I.S., W.W., M.G, P.S., T.A., S.W.; *Visualization*, M.D.J.  
598 and B.M.M.; *Supervision*, P.S., S.W., and T.A.; *Funding Acquisition*, M.D.J., C.T.S., and P.S.

599

## 600 **Competing Interest**

601 We declare that there are no conflicts of interest.

602

## 603 **Ethics approval and consent to participate**

604 We had ethical approval from the Suranaree University Ethics Committee (24/2560). Our study  
605 was undertaken using the Institute of Animals for Scientific Purpose Development (IAD)  
606 licenses belonging to P.S and C.T.S. Permission was granted by the National Park, Wildlife  
607 and Plant Conservation Department and Thailand and the National Research Council of  
608 Thailand (98/59). Further permission for work was given by the Thailand Institute of Scientific  
609 and Technological Research and Sakaerat Environmental Research Station.

610

611

612

613 **References**

- 614 Andrews, K. M. and Gibbons, J. W. (2005) How do highways influence snake movement?  
615 Behavioral responses to roads and vehicles, *Copeia*, 4: 772-782.
- 616 Aresco, M. (2005) Mitigation measures to reduce highway mortality of turtles and other  
617 herpetofauna at a North Florida lake, *The Journal of Wildlife Management*, 69(2): 549-  
618 560.
- 619 Ascensão, F. and Mira, A. (2007) Factors affecting culvert use by vertebrates along two  
620 stretches of road in southern Portugal, *Ecological Research*, 22(1): 57-66
- 621 Ascensão, F., Fahrig, L., Clevenger, A. P., Corlett, R. T., Jaegar, J. A., Laurence, W. F. and  
622 Pereira, H. M. (2018) Environmental challenges for the belt and road initiative, *Nat.*  
623 *Sustain.*, 1: 206-209.
- 624 Ashley, E. P., Kosloski, A. and Petrie, S. A. (2007) Incidence of intentional vehicle-reptile  
625 collisions, *Human Dimensions of Wildlife*, 12: 137-143.
- 626 Assis, J. R., Carvalho-Roel, C. F., Iannini-Custódio, A. E., Pereira, W. G. and Veloso, A. C.  
627 (2020) Snakes roadkill on highways in the Cerrado biome: and intentional conduct?  
628 *Studies on Neotropical Fauna and Environment*, DOI:  
629 10.1080/01650521.2020.1844942.
- 630 Balkenhol, N. and Waits, L. P. (2009) Molecular road ecology: exploring the potential of  
631 genetics for investigating transportation impacts on wildlife, *Molecular Ecology*, 18:  
632 4151-4164.
- 633 Bateman, A., Chambers, B., Pacioni, C., Rafferty, C., Jones, K. and Bencini, R. (2017)  
634 Application of underpasses to expand nature reserves: responses of a critically  
635 endangered marsupial, the woylie, *Bettongia penicillata*, *Hystrix, the Italian Journal of*  
636 *Mammalogy*, 28(2): 194-201.



- 637 Baxter-Gilbert, J. H., Riley, J. L., Lesbarrès, D. and Litzgusm J. D. (2015) Mitigating reptile  
638 road mortality: fence failures compromise ecopassage effectiveness. *PLoS ONE*.  
639 <https://doi.org/10.1371/journal.pone.0120537>.
- 640 Beckmann, C. and Shine, R. (2012) Do drivers intentionally target wildlife on roads? *Austral*  
641 *Ecology*, 37(5): 629-633.
- 642 Beckmann, J. P., Clevenger, A. P., Huijser, M. P. et al. (2010) Safe passages: highways,  
643 wildlife and habitat connectivity. Washington, DC: Island Press.
- 644 Bernardino, F. S. Jr. and Dalrymple, D. J. (1992) Seasonal activity and road mortality of the  
645 snakes of the Pa-hay-okee wetlands of Everglades National Park, USA, *Biological*  
646 *Conservation*, 62: 71-75.
- 647 Bivand, R. and Rundel, C. (2020) rgeos: interface to geometry engine – open source (‘GEOS’).  
648 <https://CRAN.R-project.org/package=rgeos>.
- 649 Bonnet, X., Naulleau, G. and Shine, R. (1999) The dangers of leaving home: dispersal and  
650 mortality in snakes, *Biological Conservation*, 89: 39-50.
- 651 Bracis, C., Bildstein, K. L. and Mueller, T. (2018) Revisitation analysis uncovers spatio-  
652 temporal patterns in animal movement data. *Ecography*. 41(11): 1801-1811.
- 653 Brehme, C. S., Tracey, J. A., McClenaghan, L. R. and Fisher, R. N. (2013) Permeability of  
654 roads to movement of scrubland lizards and small mammals, *Conservation Biology*,  
655 27(4):710-720.
- 656 Brown, G. P. and Weatherhead, P. J. (1997) Effects of reproduction on survival and growth of  
657 female Northern watersnakes, *Nerodia sipedon*, *Canadian Journal of Zoology*, 75: 424-  
658 432.
- 659 Brunen, B., Daguet, C. and Jaeger, J. A. G. (2020) What attributes are relevant for drainage  
660 culverts to serve as efficient road crossing structures for mammals? *Journal of*  
661 *Environmental Management*, 268:110423.

- 662 Calenge, C. (2006) The package adehabitat for the R software: tool for the analysis of space  
663 and habitat use by animals, *Ecological Modelling*, 197: 1035.
- 664 Clark, R. W., Brown, W. S., Stechert, R. and Zamudio, K. R. (2010) Roads, interrupted  
665 dispersal and genetic diversity in timber rattlesnakes, *Conservation Biology*, 24(4):  
666 1059-1069.
- 667 Clevenger, A. P. and Waltho, N. (2000) Factors influencing the effectiveness of wildlife  
668 underpasses in Banff National Park, Alberta, Canada, *Conservation Biology*, 14(1): 47-  
669 56.
- 670 Clevenger, A. P., Chruszcz, B. and Gunson, K. (2002) Drainage culverts as habitat linkages  
671 and factors affecting passage by mammals, *Journal of Applied Ecology*, 38(6): 1340-  
672 1349.
- 673 Clevenger, A. P. and Barrueto, M. (Eds) (2014). Trans-Canada highway wildlife and  
674 monitoring research. Final report. Part B: research.
- 675 Clevenger, A. P. and Huijser, M. P. (2009) Handbook for design and evaluation of wildlife  
676 crossing structures in North America. Washington, DC: Department of Transportation,  
677 Federal Highway Administration.
- 678 Cunnington, G. M., Garrahm E., Eberhardt, E. and Fahrig, L. (2014) Culverts alone do not  
679 reduce road mortality in anurans, *Ecoscience*, 21(1): 69-78.
- 680 Das, A., Ahmed, M. F., Lahkar, B. P. and Sharma, P. (2007) A preliminary report of reptilian  
681 mortality on road due to vehicular movement near Kaziranga National Park, Assam,  
682 India, *Zoo's Print Journal*, 22(7): 2742-2744.
- 683 Dodd Jr., C. K., Barichivich, W. J. and Smith, L. L. (2004) Effectiveness of a barrier wall and  
684 culverts in reducing wildlife mortality on a heavily travelled highway in Florida,  
685 *Biological Conservation*, 118: 619-631.

- 686 Dolia, J. (2018) Notes on the distribution and natural history of the King Cobra (*Ophiophagus*  
687 *Hannah* Cantor 1836) in the Kumaon Hills of Uttarakhand, *Herpetology Notes*, 11: 217-  
688 222.
- 689 Erritzoe, W. P., Mazgajski, T. D. and Rejt, L. (2003) Bird casualties on European roads – a  
690 review. *Acta Ornithologica*, 38: 77-93.
- 691 Forman, R. T. T. (2003) Road ecology: science and solutions, Washington, DC: Island Press.
- 692 Fortin, D., Beyer, H. L., Boyce, M. S., Smith, D. W., Duchesne, T. and Mao, J. S. (2005)  
693 Wolves influence elk movements: behavior shapes trophic cascade in Yellowstone  
694 National Park, *Ecology*, 86: 1320-1330.
- 695 Glista, D. J., DeVault, T. L. and DeWoody, J. A. (2007) Vertebrate road mortality  
696 predominantly impacts amphibians, *Herpetological Conservation and Biology*, 3(1):  
697 77-87.
- 698 Glista, D. J., DeVault, T. L., and DeWoody, J. A. (2009) A review of mitigation measures for  
699 reducing wildlife mortality on roadways. *Landscape Urban Plan*, 91: 1-7.
- 700 Grilo, C., Bissonette, J. A. and Santos-Reis, M. (2008) Response of carnivores to existing  
701 highway culverts and underpasses: implications for road planning and mitigation,  
702 *Biodiversity and Conservation*, 17(1): 1685-1699.
- 703 Grilo, C., Bissonette, J. A. and Santos-Reis, M. (2009) Spatial-temporal patterns in  
704 Mediterranean carnivore road casualties: consequences for mitigation, *Biological*  
705 *Conservation*, 142: 301-313.
- 706 Hartmann, P. A., Hartmann, M. T. and Martins, M. (2011) Snake road mortality in a protected  
707 area in the Atlantic forest of Southeastern Brazil, *South American Journal of*  
708 *Herpetology*, 6(1): 35-42.

- 709 Herrmann, H. W., Pozarowski, K. M., Ochoa, A. and Schuett, G. W. (2017) An interstate  
710 highway affects gene flow in a top reptilian predator (*Crotalus atrox*) of the Sonoran  
711 Desert, *Conservation Genetics*, 18: 911-924.
- 712 Hrima, V. L., Sailo, V. L. H., Fanai, Z., Lalronunga, S., Lalrinchhana, C., Zothanisiama and  
713 Lalremsanga, H. T. (2014) Nesting ecology of the King Cobra, *Ophiophagus hannah*,  
714 (Reptilia: Squamata: Elapidae) in Aizawl District, Mizoram, India, *Issues and Trends*  
715 *of Wildlife Conservation in Northeast India*, 2014: 268-274.
- 716 Hughes, A. C. (2017) Understanding the drivers of Southeast Asian biodiversity loss,  
717 *Ecosphere*, 8(1):e01624.10.1002/ecs2.1624
- 718 Hughes, A. C. (2018) Have Indo-Malaysian forests reached the end of the road? *Biological*  
719 *Conservation*, 223:129-137. Doi:10.1016/j.biocon.2018.04.029
- 720 Jackson, N. D. and Fahrig, L. (2011) Relative effects of road mortality and decreased  
721 connectivity on population genetic diversity, *Biological Conservation*, 144(12): 3143-  
722 3148.
- 723 Kowalczyk, R., Zalewski, A., Jędrejewska, B., Ansorge, H. and Bunevich, A. N. (2009)  
724 Reproduction and mortality of invasive raccoon dogs (*Nyctereutes procyonoides*) in the  
725 Bialowieza Primeval Forest (eastern Poland), *Annales Zoologici Fennici*, 46: 291-301.
- 726 Kranstauber, B., Smolla, M. and Scharf, A. K. (2020) move: visualising and analysing animal  
727 track data.
- 728 Langley, W. M., Lipps, H. W. and Theis, J. F. (1989) Responses of Kansas motorists to snake  
729 models on a rural highway, *Transactions of the Kansas Academy of Science*, 92: 43-48.
- 730 Laurence, W. (2014) *Thailand is risking World Heritage Area. Alliance of leading researchers*  
731 *and thinkers*. Available at [http://alert-conservation.org/road-expansion-imperils-thai-](http://alert-conservation.org/road-expansion-imperils-thai-natural-area/)  
732 [natural-area/](http://alert-conservation.org/road-expansion-imperils-thai-natural-area/).

- 733 Lister, N-M., Brocki, M. and Ament, R. (2015) Integrated adaptive design for wildlife  
734 movement under climate change, *Frontiers in Ecology and the Environment*, 13(9):  
735 493-502.
- 736 Lodé, T. (2000) Effect of a motorway on mortality and isolation of wildlife populations,  
737 *AMBIO A Journal of the Human Environment*, 29: 163-166.
- 738 Lutterschmidt, W, I., Turk, S. B. and Wilson, E. D. (2005) Seasonal timing of follicular  
739 development of the mud snake, *Farancia abacura* (Colubridae), *Herpetological*  
740 *Review*, 36(3): 244-248.
- 741 Markle, C. E., Gillingwater, S. D., Levick, R. and Chow-Fraser, P. (2017) The true cost of  
742 partial fencing: evaluating strategies to reduce reptile road mortality. *Wildlife Society*  
743 *Bulletin*, 41(2): doi: 10.1002/wsb.767.
- 744 Marshall, B. M., Strine, C. T., Jones, M. D., Artchawakom, T., Silva, I., Suwanwaree, P. and  
745 Goode, M. (2019) Space fit for a king: spatial ecology of King Cobras (*Ophiophagus*  
746 *hannah*) in Sakaerat Biosphere Reserve, northeast Thailand, *Amphibia-Reptilia*,  
747 DOI:10.1163/15685381 – 18000008.
- 748 Marshall, B. M., Strine, C. T., Jones, M. D., Theodorou, A., Amber, E., Waengsothorn, S.,  
749 Suwanwaree, P. and Goode, M. (2018) Hits close to home: repeated persecution of  
750 King Cobras (*Ophiophagus hannah*) in northeastern Thailand, *Tropical Conservation*  
751 *Science*, 11: 1-14.
- 752 Marshall, B. M., Crane, M., Silva, I., Strine, C. T., Jones, M, D., Hodges, C. W., Suwanwaree,  
753 P., Artchawakom, T., Waengsothorn, S. and Goode, M. (2020) No room to roam: King  
754 Cobras reduce movement in agriculture, *Movement Ecology*, 8:33.
- 755 Muff, S., Signer, J. and Fieberg, J. (2020) R code and output supporting “Accounting for  
756 individual-specific variation in habitat-selection studies: efficient estimation of mixed-

- 757 effects models using Bayesian or frequentist computation”. Retrieved from the Data  
758 Repository for the University of Minnesota, <https://doi.org/10.13020/8bhv-dz98>.
- 759 Myers, N., Mittermeier, R. A., Mittermeier, C. G., da Fonseca, G. A. B. and Kent, J. (2000)  
760 Biodiversity hotspots for conservation priorities, *Nature*, 403:853-858.  
761 Doi:10.1038/35002501
- 762 Myslajek, R. W., Nowak, S., Kurek, K., Tolkacz, K. and Gewartowska, O. (2016) Utilisation  
763 of a wide underpass by mammals on an expressway in the Western Carpathians, S.  
764 Poland. *Journal of Vertebrate Biology*, 65(3): 225-232.
- 765 Ng, S. J., Dole, J. W., Sauvaio, R. M., Riley, S. P. and Valone, T. J. (2004) Use of highway  
766 undercrossings by wildlife in southern California, *Biological Conservation*, 115(3):  
767 499-507.
- 768 Ng, L. S., Camos-Arceiz, A., Sloan, S., Hughes, A. C., Tiang, D. C. F., Li, B. V. and Lechner,  
769 A. M. (2020) The scale of biodiversity impacts of the belt and road initiative in  
770 southeast Asia, *Biological Conservation*, 248: 108691.
- 771 Northrup, J. M., Hooten, M. B., Anderson, C. R. and Wittemyer, G. (2013) Practical guidance  
772 on characterizing availability in resource selection functions under a use-availability  
773 design, *Ecology*, 94: 1456-1463.
- 774 Reinert, H. K. and Cundall, D. (1982) An improved surgical implantation method for radio-  
775 tracking snakes. *Copeia*. 3: 702-705.
- 776 Rodríguez, A., Crema, G. and Delibes, M. (1996) Use of non-wildlife passages across a high  
777 speed railway by terrestrial vertebrates, *Journal of Applied Ecology*, 33: 1527-1540.
- 778 Rosen, P. C. and Lowe, C. H. (1994) Highway mortality of snakes in the Sonoran Desert of  
779 southern Arizona, *Biological Conservation*, 68: 143-148.
- 780 Roth, T. C. and Greene, B. D. (2006) Movement patterns and home range of the Northern  
781 watersnake (*Nerodia sipedon*), *Copeia*, 3: 544-551.

- 782 Row, J. R., Blouin-Demers, G. and Weatherhead, P. J. (2007) Demographic effects of road  
783 mortality in black ratsnakes (*Elaphe obsoleta*), *Biological Conservation*, 137: 117-124.
- 784 Rue, H., Martino, S. and Chopin, N. (2009) Approximate Bayesian interface for latent Gaussian  
785 models by using integrated nested Laplace approximations (with discussion), *Journal*  
786 *of the Royal Statistical Society, Series B (Methodological)*, 71: 319-392.
- 787 Rytwinski, T. and Fahrig, L. (2012) Do species life history traits explain population responses  
788 to roads? A meta-analysis, *Biological Conservation*, 147: 87-98.
- 789 Rytwinski, T., Soanes, K., Jaeger, J. A. G., Fahrig, L., Findlay, C. S., Houlahan, J., van der  
790 Ree, R. and van der Grift, E. (2016) How effective is road mitigation at reducing road-  
791 kill? A meta-analysis, *PLoS ONE*, 11, doi:10.1371/journal.pone.0166941.
- 792 Schneider, A., Mertes, C. M., Tatem, A. J., Tan, B., Sulla-Menashe, D., Graves, S. J., Patel, N.  
793 N., Horton, J. A., Gaughan, A. E., Ollo, J. T., Schelly, I. H., Stevens, F. R. and Dastur,  
794 A. (2015) A new urban landscape in East-Southeast Asia, 2000-2010, *Environmental*  
795 *Research Letters*, 10(3), 034002.
- 796 Secco, H., Ratton, P., Castro, E., Lucas, D. P. and Bager, A. (2014) Intentional snake road-kill:  
797 a case study using fake snakes on a Brazilian road, *Tropical Conservation Science*, 7(3):  
798 561-571.
- 799 Shepard, D. B., Kuhns, A. R., Dreslik, M. J. and Phillips, C. A. (2008a) Roads as barrier to  
800 animal movement in fragmented landscapes, *Animal Conservation*, 11:288-296.
- 801 Shepard, D. B., Dreslik, M. J., Dreslik, Jellen, B. C. and Phillips, C. A. (2008b) Reptile road  
802 mortality around an oasis in the Illinois corn desert with emphasis on the endangered  
803 Eastern massasauga, *Copeia*, 2008: 350-359.
- 804 Shine, R., Lemaster, M., Wall, M., Langkilde, T. and Mason, R. (2004) Why did the snake  
805 cross the road? Effects of roads on movement and location of mates by garter snakes  
806 (*Thamnophis sirtalis parietalis*). *Ecology and Society*. 9(1): 9.

- 807 Signer, J., Fieberg, J. and Avgar, T. (2019) Animal movement tools (amt): R package for  
808 managing tracking data and conducting habitat selection analyses. *Ecology and*  
809 *Evolution*. 9: 880-890.
- 810 Silva, I., Crane, M. and Savini, T. (2020) High roadkill rates in the Dong Phrayayen-Khao Yai  
811 World Heritage Site: conservation implications of a rising threat to wildlife, *Animal*  
812 *Conservation*, doi:10.1111/acv.12560
- 813 Simpson, N. O., Stewart, K. M., Schroeder, C., Cox, M., Huebner, K. and Wasley, T. (2016)  
814 Overpasses and underpasses: effectiveness of crossing structures for migratory  
815 ungulates. *The Journal of Wildlife Management*. 80(8): doi: 10.1002/jwmg.21132.
- 816 Smith, S. N., Jones, M. D., Marshall, B. M., Waengsothorn, S., Gale, G. A. and Strine, C. T.  
817 (2021) Native Burmese pythons exhibit site fidelity and preference for aquatic habitats  
818 in an agricultural mosaic. *Scientific Reports*. 11 (7041). [https://doi.org/10.1038/s41598-](https://doi.org/10.1038/s41598-021-86640-1)  
819 [021-86640-1](https://doi.org/10.1038/s41598-021-86640-1).
- 820 Sosa, R. and Schalk, C. M. (2016) Seasonal activity and species habitat guilds influence road-  
821 kill patterns of neotropical snakes, *Tropical Conservation Science*, doi:  
822 <https://doi.org/10.1177/1940082916679662>.
- 823 Sparks, J. L. and Gates, J. E. (2017) Seasonal and regional animal use of drainage structures to  
824 cross under roadways, *Human-Wildlife Interactions*, 11(2): 9.
- 825 Srikrajang, M. (2006) Survey to determine the point and width of the wildlife corridor on  
826 highway 304 at the 27-29 kilometer marker between Khao Yai National Park and Thap  
827 Lan National Park, *Wildlife Yearbook*, 7: 44-67.
- 828 Stuart, B., Wogan, G., Grismer, L., Auliya, M., Inger, R. F., Lilley, R., Chan-Ard, T., Thy, N.,  
829 Nguyen, T. Q., Srinivasulu, C. and Jelić, D. (2012) *Ophiophagus Hannah*. The IUCN  
830 Red List of Threatened Species. e.T177540A1491874.



- 831 <https://dx.doi.org/10.2305/IUCN.UK.2012-1.RLTS.T177540A1491874.en>.
- 832 Downloaded on 09 July 2021.
- 833 Tedersoo, L., Küngas, R., Oras, E., Köster, K., Eenmaa, H., Leijen, A., Pedaste, M., Raju, M.,  
834 Astapova, A., Lukner, H., Kogermann, K. and Sepp, T. (2021) Data sharing practises  
835 and data availability upon request differ across scientific disciplines. *Scientific Data*. 8,  
836 192 (2021).
- 837 Thurfjell, H., Ciuti, S. and Boyce, M. S. (2014) Applications of step-selection functions in  
838 ecology and conservation. *Movement Ecology*. 2(4).
- 839 Vaeokhaw, S., Ngoprasert, D., Swatdipong, A., Gale, G. A., Klinsawat, W. and  
840 Vichitsoonthonkul, T. (2020) Effects of a highway on the genetic diversity of Asiatic  
841 black bears. *Ursus*. 31(e3): 1-15.
- 842 Ważna, A., Kaźmierczak, A., Cichocki, J., Bojarski, J. and Gabryś, G. (2020) Use of  
843 underpasses by animals on a fenced expressway in a suburban area in western Poland.  
844 *Nature Conservation*, 39: 1-18.
- 845 Whitaker, N., Shankar, P. G. and Whitaker, R. (2013) Nesting ecology of the King Cobra  
846 (*Ophiophagus Hannah*) in India, *Hamadryad*, 36(2): 101-107.
- 847 Winne, C. T., Willson, J., Andrews, K. and Reed, R. N. (2006) Efficacy of marking snakes  
848 with disposable medical cautery units, *Herpetological Review*, 37:52-54.
- 849 Yanes, M., Velasco, J. M. and Suárez, F. (1995) Permeability of roads and railways to  
850 vertebrates: the importance of culverts. *Biological Conservation*, 71: 217-222.
- 851
